# Supplementary material for: Dapsone Azo-Linked with Two Mesalazine Moieties Is a “Me-Better” Alternative to Sulfasalazine
Source: MDPI journal article supplement (doi:10.3390/pharmaceutics14030684), 2022-03-21
Supplement: s1 [file s1]

# Supplementary Materials: Dapsone Azo-Linked with Two Mesalazine Moieties Is a “Me-Better” Alternative to Sulfasalazine

Changyu Kang, Jaejeong Kim, Sanghyun Ju, Sohee Park, Jin-Wook Yoo, In-Soo Yoon, Min-Soo Kim and Yunjin Jung

**Table S1.** IR and  $^1\text{H}$ -NMR spectra of AS-DpS-AS.

| Score | Feature                                                                                              |
|-------|------------------------------------------------------------------------------------------------------|
| 0     | normal appearance                                                                                    |
| 1     | localized hyperemia but no ulcer                                                                     |
| 2     | linear ulcers without significant inflammation                                                       |
| 3     | 2–4 cm site of inflammation and ulceration                                                           |
| 4     | serosal adhesion to other organs, 2–4 cm site of inflammation and ulceration                         |
| 5     | stricture, serosal adhesion involving several bowel loops, <4 cm site of inflammation and ulceration |

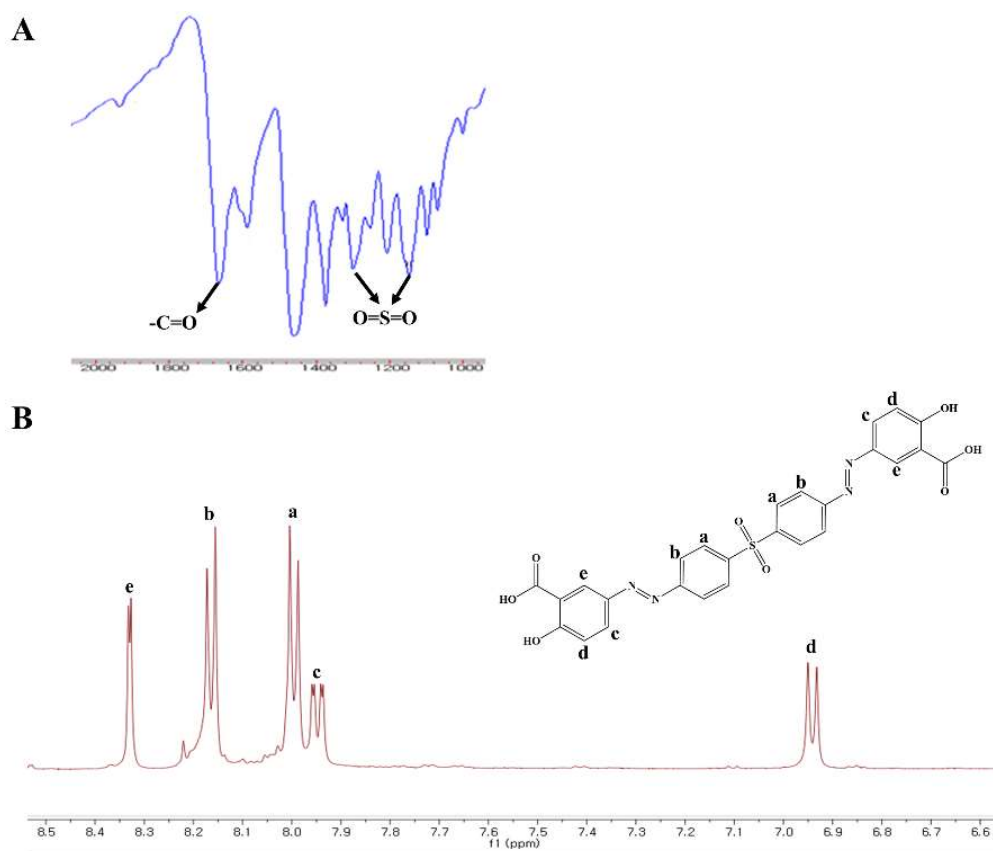

**Figure S1.** IR and  $^1\text{H}$ -NMR spectra of AS-DpS-AS. (A) IR spectrum of AS-DpS-AS, (B)  $^1\text{H}$ -NMR spectrum of AS-DpS-AS.

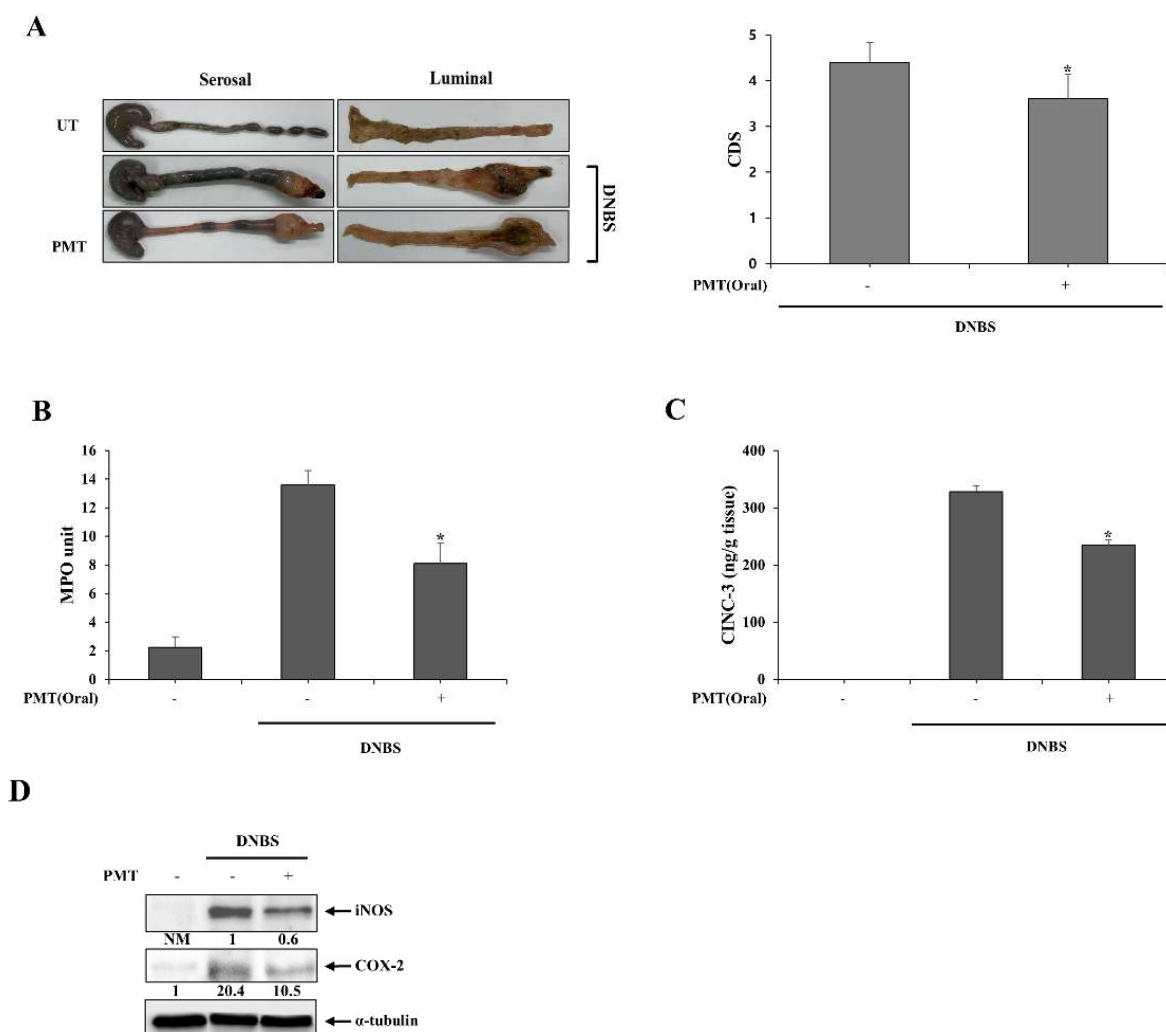

**Figure S2.** Anti-colitic effects of oral PMT against DNBS-induced rat colitis. Three days after colitis induction by DNBS, a physical mixture (PMT) of 5-ASA (19 mg/kg) and DpS (15 mg/kg) was administered orally to rats once per day, and the rats were sacrificed after 6 days of treatment. (A) Left panel: Serosal and luminal sides of the distal colon of rats were photographed. Representative images are shown. Right panel: Colon damage score (CDS) was determined for each group, as described in the Methods section. \* $\alpha < 0.05$ , vs. the DNBS control. (B) Myeloperoxidase (MPO) activity was measured in the inflamed distal colon (4 cm). (C) CINC-3 levels in the inflamed colon were measured using an ELISA kit. (D) iNOS and COX-2 levels were measured in the inflamed distal colon using western blotting. \* $P < 0.05$  vs. control. The data in A, B, and C represent mean  $\pm$  SD (n = 5).
